# Supplementary material for: Bta-miR-6531 Regulates Calcium Influx in Bovine Leydig Cells and Is Associated with Sperm Motility
Source: MDPI journal article supplement (doi:10.3390/genes13101788), 2022-10-03
Supplement: s1 [file s1]

Tables

Table S1. the primers are used in this study

| Primers                          | Sequence (5'-3')                                                       |
|----------------------------------|------------------------------------------------------------------------|
| gene-MIR6531 F                   | GCAGAGCGTGTCTTAGTTA                                                    |
| gene-MIR6531 R                   | CCGTCAGGTACTCCAACA                                                     |
| bta-miR-6531<br>(cDNA synthesis) | GTCGTATCCAGTGCAGGGTCCGAGGTATTTCGCACT<br>GGATACGACTCTCTC                |
| bta-miR-6531<br>(qPCR)           | GCGCGTAGACTTGGTGTACTTT                                                 |
| URP                              | AGTGCAGGGTCCGAGGTATT                                                   |
| U6 F                             | CTCGCTTCGGCAGCACA                                                      |
| U6 R (cDNA<br>synthesis)         | AACGCTTCACGAATTTGCGT                                                   |
| Bta-miR-6531<br>mimics           | Sense UAGACUUGGUGUACUUUGAGAGA<br>Antisense UCUCAAAGUACACCAAGUCUAUU     |
| Bta-miR-6531<br>inhibitor        | UCUCUCAAAGUACACCAAGUCUA                                                |
| NC mimics                        | Sense UUCUCCGAACGUGUCACGUTT<br>Antisense ACGUGACACGUUCGGAGAATT         |
| NC inhibitor                     | CAGUACUUUUGUGUAGUACAA                                                  |
| miR6531-F-BamH I                 | cgGGATCCAGAGCGTGTCTTAGTTA                                              |
| miR6531-R-EcoR I                 | cGAATTCCTCCGTCAGGTACTCCAACA                                            |
| ATP2A2-seed-F                    | acgcGTCGACggcaggcatcagagtcacat                                         |
| ATP2A2-seed-R                    | attGCGGCCCGCgtgtgtatatgccccgtcct                                       |
| ATP2A2-mut-F                     | CAGgggggggAAAATTGTAGAATTTCTTCAGTCGTTTG                                 |
| ATP2A2-mut-R                     | ACAATTTTcccccccTGGAAGGTTCAACTCGAGCA                                    |
| GAPDH-F                          | GATGGTGAAGGTCGGAGTGAAC                                                 |
| GAPDH-R                          | GTCATTGATGGCGACGATGT                                                   |
| ATP2A2-F                         | CAGGCATCAGAGTCATCAT                                                    |
| ATP2A2-R                         | GGTGGAGAAGTTGTCATCA                                                    |
| siATP2A2                         | Sense CAGCUAUGACUGGAGACGGUGUAAA<br>Antisense UUUACACCGUCUCCAGUCAUAGCUG |
| siRNA control                    | Sense CAGAGUAGGUCCAGAGUGGUUCAA<br>Antisense UUUGAACCACUCUGGACCUACUCUG  |

Table S2 the sperms samples used in WB analysis

|               | Bulls' ID | Fresh motility (%) | Frozen motility (%) |
|---------------|-----------|--------------------|---------------------|
| Low motility  | 1         | 62.4               | 36.25               |
|               | 2         | 62.4               | 28.33               |
|               | 3         | 62.75              | 35.12               |
| Mean±SEM      |           | 62.15±0.16         | 33.24±3.50          |
| High motility | 4         | 73.46              | 44                  |
|               | 5         | 73.63              | 49.44               |
|               | 6         | 73.72              | 46.11               |
| Mean±SEM      |           | 73.60±0.11         | 46.52±2.24          |

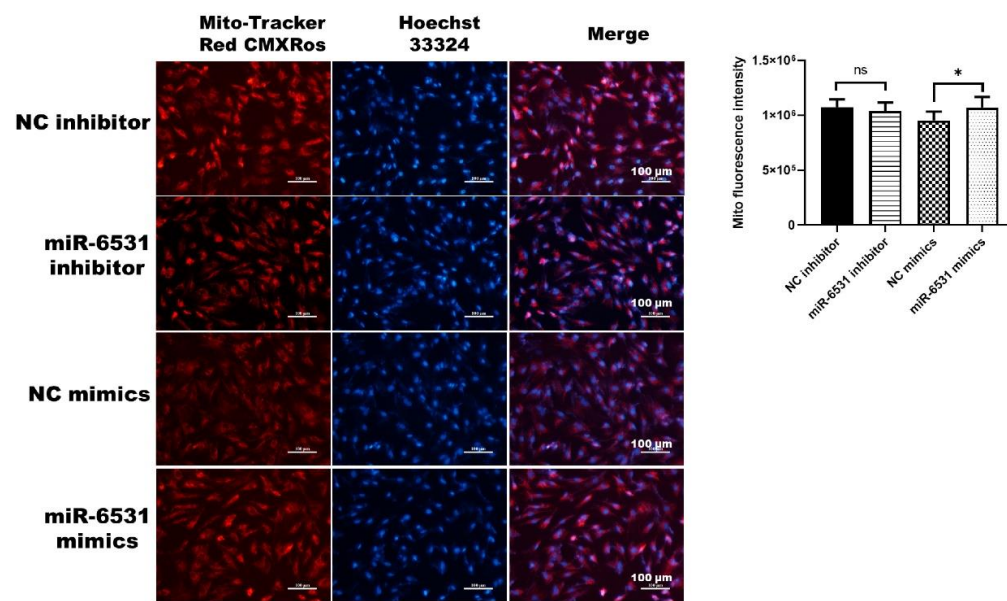

Figure S1. Measurement of MMP using fluorescent probe in Leydig cell.

Bovine Leydig cells were transfected with NC mimics or bta-miR-6531 mimics, and NC inhibitor or bta-miR-6531 inhibitors over 48 h, the cell MMP were measured. The mitochondria are marked by MitoTracker Red CMXRos, and nuclear is stained by Hoechst 33342.
